# Supplementary material for: Is there a universal reaction mechanism of Li insertion into oxidic spinels: a case study using MgFe2O4
Source: Royal Society of Chemistry journal article supplement (doi:10.1039/c4ta05054a), 2014-11-20
Supplement: c4ta05054a1.pdf [file c4ta05054a1.pdf]

## Supporting Information:

### Is there a universal reaction mechanism of Li insertion into oxidic spinels: A case study using $\text{MgFe}_2\text{O}_4$

Stefan Permien<sup>a</sup>, Sylvio Indris<sup>b</sup>, Marco Scheuermann<sup>b</sup>, Ulrich Schürmann<sup>c</sup>, Valeriu Mereacre<sup>d</sup>, Annie K. Powell<sup>d</sup>, Lorenz Kienle<sup>c</sup>, and Wolfgang Bensch<sup>a</sup>

<sup>a</sup>Institute of Inorganic Chemistry, University of Kiel, Max-Eyth-Straße 2, 24118 Kiel, Germany

<sup>b</sup>Institute for Applied Materials – Energy Storage Systems, Karlsruhe Institute of Technology, P.O. Box 3640, 76021 Karlsruhe, Germany

<sup>c</sup>Institute for Materials Science, University of Kiel, Kaiserstr. 2, 24143 Kiel, Germany

<sup>d</sup>Institute of Inorganic Chemistry, Karlsruhe Institute of Technology, Engesser Str. 15, 76131 Karlsruhe, Germany

## EDX

Supplementary Table 1:

| sample                       | Measure No.    | Mg / At %    | Fe / At %    | Ratio Mg : Fe   |
|------------------------------|----------------|--------------|--------------|-----------------|
| $\text{MgFe}_2\text{O}_4\_A$ | 1              | 36.87        | 63.13        |                 |
|                              | 2              | 39.90        | 60.10        |                 |
|                              | 3              | 39.65        | 60.35        |                 |
|                              | 4              | 31.32        | 68.68        |                 |
|                              | <b>Average</b> | <b>36.94</b> | <b>63.07</b> | <b>1 : 1.71</b> |
| $\text{MgFe}_2\text{O}_4\_B$ | 1              | 28.79        | 71.21        |                 |
|                              | 2              | 34.25        | 65.75        |                 |
|                              | 3              | 31.07        | 68.93        |                 |
|                              | 4              | 40.51        | 59.49        |                 |
|                              | <b>Average</b> | <b>33.66</b> | <b>66.35</b> | <b>1 : 1.97</b> |

## SEM

Fig. 1 shows another SEM image of the sample  $\text{MgFe}_2\text{O}_4\_B$ .

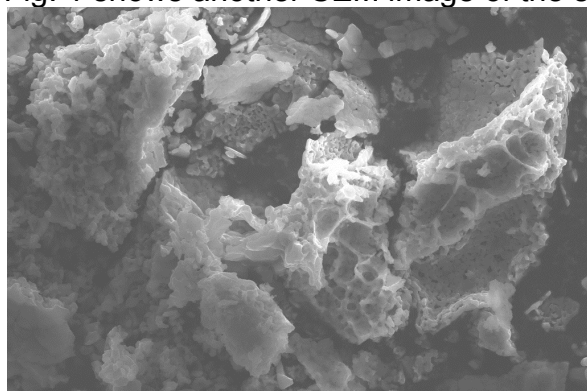

Supplementary Fig. 1: SEM map images of the sample  $\text{MgFe}_2\text{O}_4\_B$

## N<sub>2</sub>-Adsorption

Adsorption/Desorption of N<sub>2</sub> samples A and B:

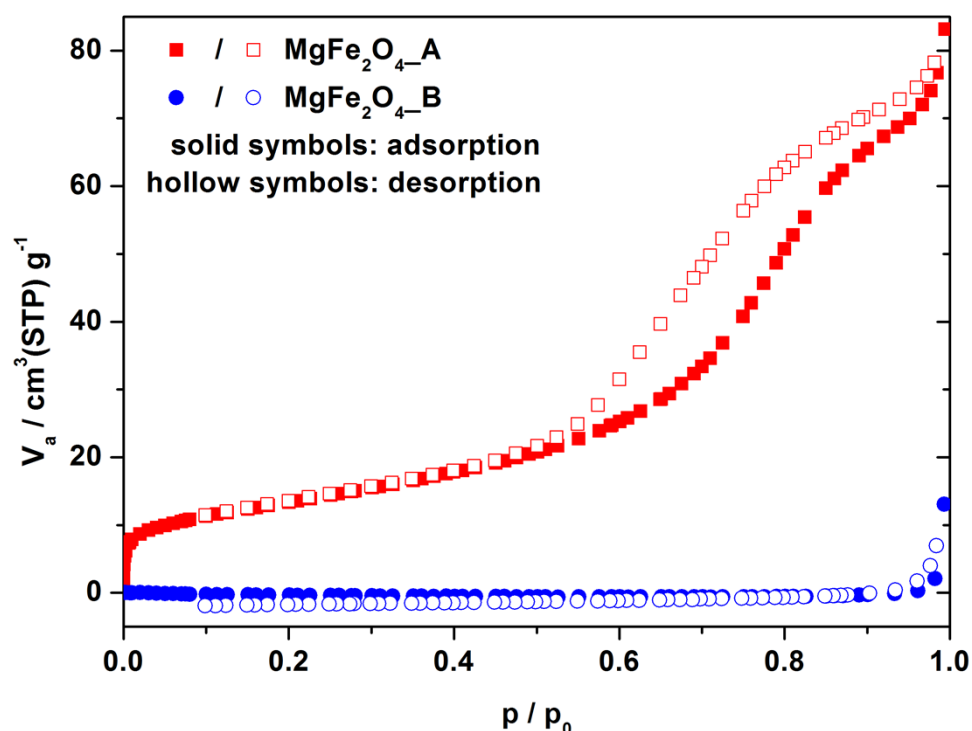

Supplementary Fig. 2: N<sub>2</sub> Adsorption and Desorption for sample  $\text{MgFe}_2\text{O}_4\text{-A}$  and B,

## MgO as anode material in Lithium battery

For electrochemical measurement 80 wt% MgO was mixed with 10 wt.% SUPER C65 Carbon (Timcal, Switzerland) and 10 wt.% PVdF (Solvay, Germany). The mixture was dissolved with NMP (N-methyl-2-pyrrolidone), deposited on copper foil and dried overnight at room temperature and sintered at 100 °C for 24 h in a vacuum drying chamber. Afterwards 10 mm discs were cut with about 2 mg active material and used as cathode in a swagelok type test cell, using lithium metal as the anode, glass fiber filter disks (Whatman, United Kingdom) as the separator, and a solution of 1 M  $\text{LiPF}_6$  in an ethylene carbonate/dimethyl carbonate mixture (Merck, Germany) as electrolyte. Test cells were discharged/charged with C/10 rate, performed with a Materials Mates 510 DC.

The first discharge curve of MgO is shown in Fig. 3. According to the very low capacity it is supposed that no conversion of MgO takes place.

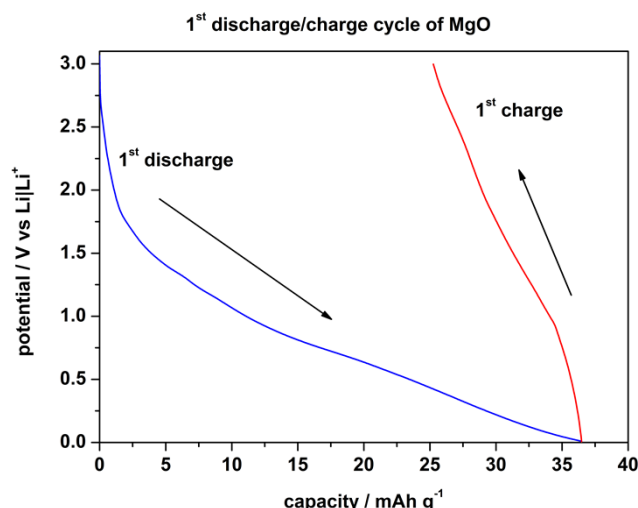

**Supplementary Fig. 3: First discharge (blue)/charge (red) Cycle of nanocrystalline MgO.**

### ***Ex-situ* XRD on lithiated $\text{MgFe}_2\text{O}_4$ \_A**

In Fig. 4 the detailed area of the XRD pattern 33–45° 2 Theta is shown for the pristine material and after 0.3, 1.0, 1.5 and 2.0 Li per formula unit of sample A. The shift of the strong 311 peak at 35.5° of the spinel structure of sample A is shifting a little bit 0.3 %, this is not observed for sample B (Fig. 5). The decreasing intensity with increasing Li amount per formula unit can be clearly observed.

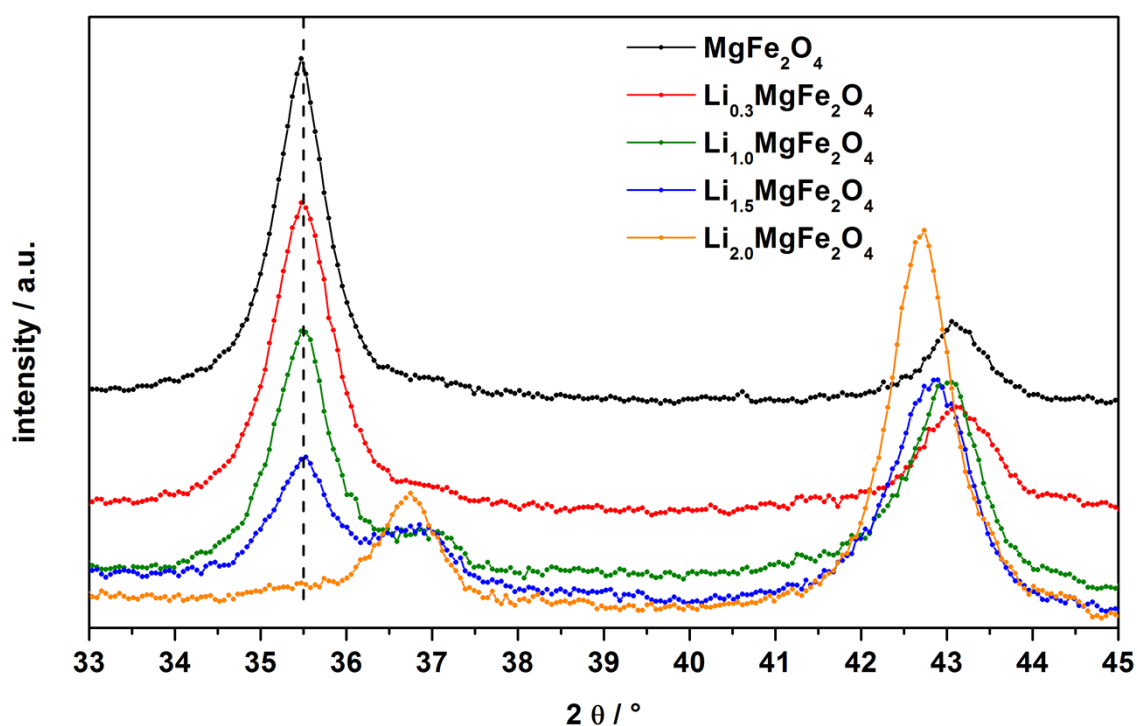

**Supplementary Fig. 4: XRD pattern of pristine material and after insertion of 0.3, 1.0, 1.5, 2.0 Li of sample  $\text{MgFe}_2\text{O}_4$ \_A.**

### Ex-situ XRD on lithiated $\text{MgFe}_2\text{O}_4$ \_B

In Fig. 5 the detailed area of the XRD pattern 33-45° 2 $\theta$  is shown for the pristine material and after 0.3, 1.0, 1.5 and 2.0 Li per formula unit of sample B. Strong 311 peak at 35.5° of the spinel structure is **not** shifting. But for insertion of 0.3 Li the 400 reflection peak 43° has an asymmetric shape because the monoxide is already formed.

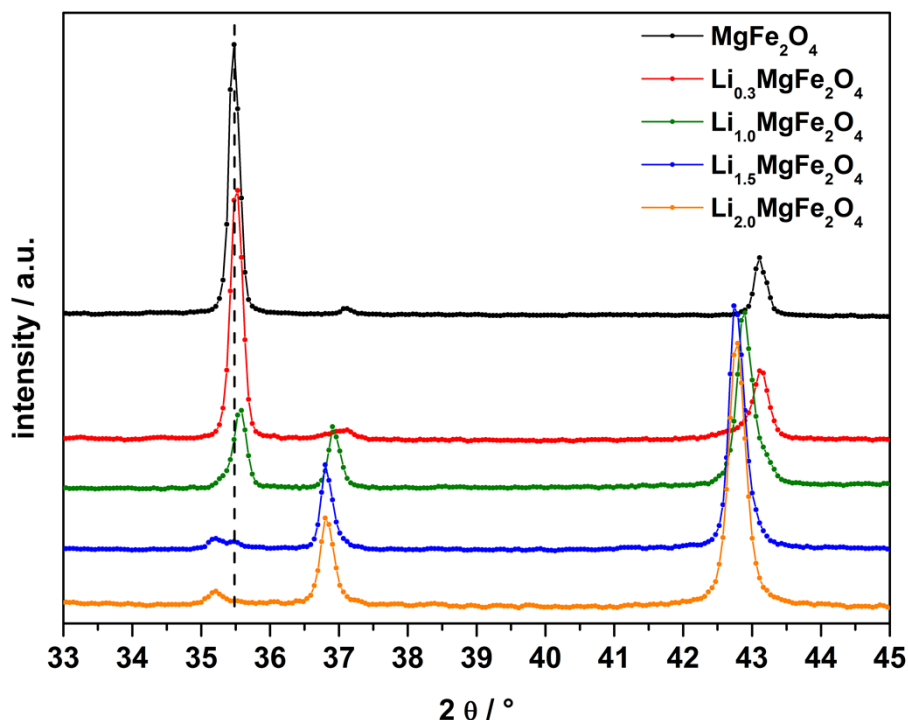

Supplementary Fig. 5: XRD pattern of pristine material and after insertion of 0.3, 1.0, 1.5, 2.0 Li of sample  $\text{MgFe}_2\text{O}_4$ \_B.

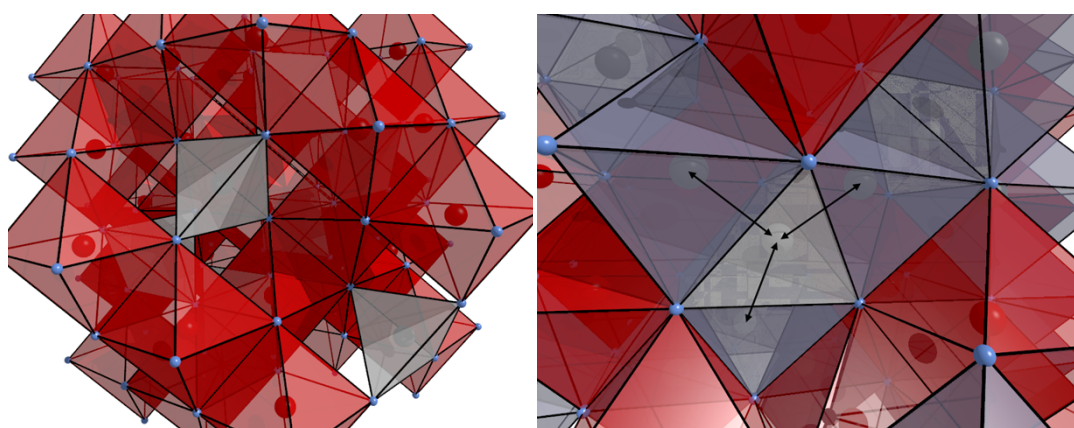

Fig. 6: Schematic illustration of the pristine spinel (left) and with occupied octahedral sites 16d (right) black arrows display the distances under 2 Å next to neighboured occupied octahedral sites.

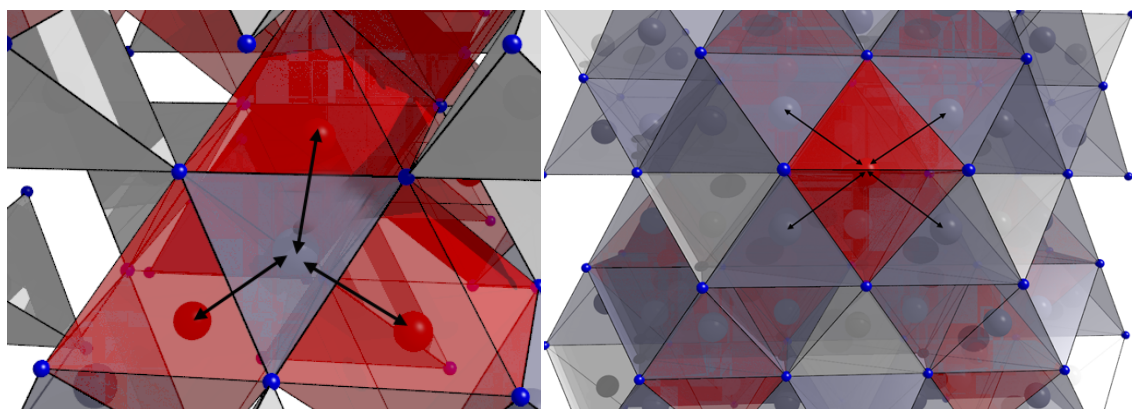

**Fig. 7: Schematic illustration of the spinel with occupied tetrahedral sites 8b (left) and occupied tetrahedral sites 48f (right) black arrows display the distances under 2 Å next to neighbored occupied octahedral sites.**
